# Supplementary material for: Encapsulated feeder cells within alginate beads for ex vivo expansion of cord blood-derived CD34+cells
Source: Royal Society of Chemistry journal article supplement (doi:10.1039/c6bm00191b), 2016-01-01
Supplement: c6bm00191b1.pdf [file c6bm00191b1.pdf]

## **Supporting information**

### **Encapsulated feeder cells within alginate beads for *ex vivo* expansion of cord blood-derived CD34<sup>+</sup> cells**

Xiuwei Pan, Qiong Sun, Haibo Cai\*, Yun Gao\*, Wensong Tan, Weian Zhang\*

State Key Laboratory of Bioreactor Engineering; Shanghai Key Laboratory of Functional Materials Chemistry, East China University of Science and Technology, 130 Meilong Road, Shanghai 200237, China.

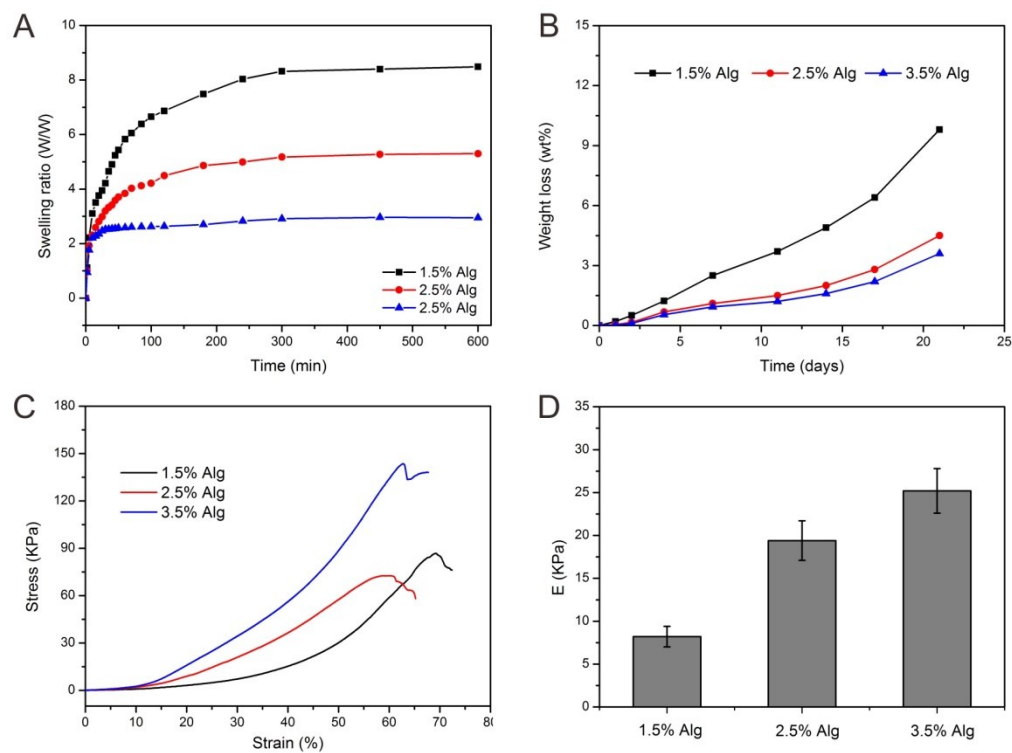

**Fig. S1** (A) Swelling behavior of alginate beads. (B) Weight loss of alginate beads during 21-day incubation. (C) Stress-strain curves and (D) elastic modulus of alginate beads from uniaxial compression. Results were mean  $\pm$  SD,  $n = 3$  replicates per experiment.

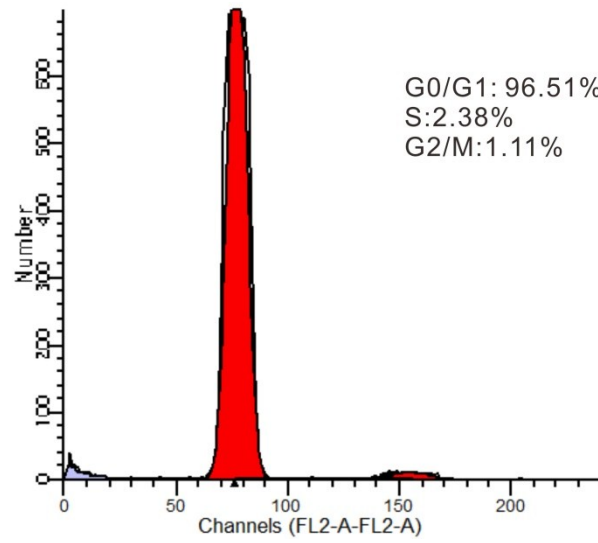

**Fig. S2** Representative cell cycle distribution graph of uncultured CD34<sup>+</sup> cells.

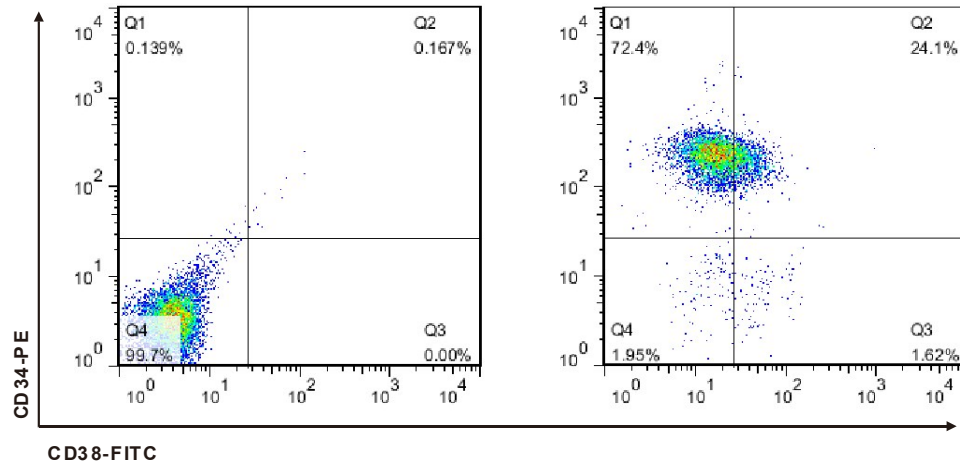

**Fig. S3** Representative density plot of CD34<sup>+</sup>CD38<sup>-</sup> phenotype of uncultured CD34<sup>+</sup> cells.
